# Supplementary material for: Climate Change Resilience and Sustainable Tropical Agriculture: Farmers’ Perceptions, Reactive Adaptations and Determinants of Reactive Adaptations in Hainan, China
Source: MDPI journal article supplement (doi:10.3390/atmos13060955), 2022-06-11
Supplement: s1 [file s1]

## Table S1 Farmers' Household Survey Questionnaire

### Perception of farmers regarding Climate Change and reactive adaptations

This research survey questionnaire is only for academic purposes with the objective of “*Investigating reactive adaptations by local farmers for climate change resilience and sustainable agriculture*”. Respondents are assured of confidentiality of any view expresses in relation to this research. I, therefore entreat you to provide information as accurate as possible for authentic results. Seeking a kind cooperation from your side. Thanking in anticipation!

### **Section A**

#### Personal Attributes and Socio-economic factors

|                                                                               |                        |                           |
|-------------------------------------------------------------------------------|------------------------|---------------------------|
| 1a) Gender:                                                                   | (a) Male               | (b) Female                |
| 2a) Age of Respondent (years):                                                | (a) 0-25               | (b) 25-45                 |
| 3a) Respondent is household head                                              | (a) Yes                | (b) No                    |
| 4a) Residing in the area since                                                | (a) 0-5                | (b) 6-10                  |
|                                                                               | (c) 11-15              | (d) 16-20                 |
|                                                                               | (e) 21-25              | (f) 26 and above          |
| 5a) Respondent's Education level (years)                                      | (a) Illiterate         | (b) Primary School        |
|                                                                               | (c) Junior High school | (d) High School and above |
| 6a) Household Size (Persons in No.)                                           | (a) 1-3                | (b) 4-6                   |
| 7a) Family members engaged in farming                                         | (a) 1-3                | (b) 4-6                   |
| 8a) Farming Experience (years)                                                | (a) 0-5                | (b) 6-15                  |
|                                                                               | (c) 16-25              | (d) 26 and above          |
| 9a) Access to Credit                                                          | (a) Yes                | (b) No                    |
| 10a) Any training received related to climate change and relevant adaptations | (a) Yes                | (b) No                    |
| 11a) Demand for any training or guidance from government                      | (a) Yes                | (b) No                    |
| 12a) Distance to nearest county center                                        | (a) 0-5km              | (b) 6-10km                |
|                                                                               | (c) 11-15km            | (d) 16km and above        |
| 13a) Frequency of market visits (No.)                                         |                        |                           |
| 14a) Area of Agricultural land (acre)                                         |                        |                           |
| 15a) Any kind of insurance for extreme weather events and related loss        | (a) Yes                | (b) No                    |
| 16a) Annual household income (RMB)                                            |                        |                           |
| 17a) Annual income from agriculture (RMB)                                     |                        |                           |
| 18a) Linked to any farming community / organization                           | (a) Yes                | (b) No                    |
| 19a) Type of agriculture crops grown                                          | (a) Food crops         | (b) Cash crops            |
|                                                                               | (c) Animal husbandry   | (d) Aquatic products      |

### **Section B**

Perception of Climate Change

|                                                               |         |        |
|---------------------------------------------------------------|---------|--------|
| 1b) Noticed any changes in climate in last decade?            | (a) Yes | (b) No |
| 2b) Noticed any changes in rainfall pattern in last decade?   | (a) Yes | (b) No |
| 3b) Noticed any changes in typhoon pattern in last decade?    | (a) Yes | (b) No |
| 4b) Noticed any changes in precipitation in last decade?      | (a) Yes | (b) No |
| 5b) Noticed any changes in temperature in last decade?        | (a) Yes | (b) No |
| 6b) Noticed any changes in drought occurrence in last decade? | (a) Yes | (b) No |
| 7b) Noticed any changes in flood pattern in last decade?      | (a) Yes | (b) No |

**Section C**

Damage due to Climate Change in last decade

|                                                                                         |         |        |
|-----------------------------------------------------------------------------------------|---------|--------|
| 1c) Any damage caused to agriculture from extreme events in last decade?                | (a) Yes | (b) No |
| 2c) Annual percentage loss in crop and agricultural production due to climatic changes? |         |        |
| 3c) Damage caused to agriculture from rainfall in last decade                           | (a) Yes | (b) No |
| 4c) Damage caused to agriculture from typhoon in last decade                            | (a) Yes | (b) No |
| 5c) Damage caused to agriculture from precipitation in last decade                      | (a) Yes | (b) No |
| 6c) Damage caused to agriculture from temperature changes in last decade                | (a) Yes | (b) No |
| 7c) Damage caused to agriculture from drought in last decade                            | (a) Yes | (b) No |
| 8c) Damage caused to agriculture from flooding in last decade                           | (a) Yes | (b) No |

**Section D**

Reactive adaptations

|                                                                                          |                |  |                                                                                                                                                       |   |   |   |   |        |   |   |   |    |
|------------------------------------------------------------------------------------------|----------------|--|-------------------------------------------------------------------------------------------------------------------------------------------------------|---|---|---|---|--------|---|---|---|----|
| 1d) Currently practicing adaptations against extreme events or climate change?           |                |  | (a) Yes                                                                                                                                               |   |   |   |   | (b) No |   |   |   |    |
| (If practicing some adaptations, then please answer following questions)                 |                |  |                                                                                                                                                       |   |   |   |   |        |   |   |   |    |
| 2d) Follow up weather forecasts?                                                         |                |  | (a) Yes                                                                                                                                               |   |   |   |   | (b) No |   |   |   |    |
|                                                                                          |                |  | How likely is that you would recommend this practice: Please assign a score (with 1 representing “not at all” and 10 representing “extremely likely”) |   |   |   |   |        |   |   |   |    |
| Weights                                                                                  | Sustainability |  | 1                                                                                                                                                     | 2 | 3 | 4 | 5 | 6      | 7 | 8 | 9 | 10 |
|                                                                                          | Feasibility    |  | 1                                                                                                                                                     | 2 | 3 | 4 | 5 | 6      | 7 | 8 | 9 | 10 |
|                                                                                          | Effectiveness  |  | 1                                                                                                                                                     | 2 | 3 | 4 | 5 | 6      | 7 | 8 | 9 | 10 |
| 3d) Changed crop varieties (for example early maturing, stress resistant varieties etc.) |                |  | (a) Yes                                                                                                                                               |   |   |   |   | (b) No |   |   |   |    |
|                                                                                          |                |  | How likely is that you would recommend this practice: Please assign a score (with 1 representing “not at all” and 10 representing “extremely likely”) |   |   |   |   |        |   |   |   |    |
| Weights                                                                                  | Sustainability |  | 1                                                                                                                                                     | 2 | 3 | 4 | 5 | 6      | 7 | 8 | 9 | 10 |

|                                                                                                         |                |                                                                                                                                                       |   |   |   |   |   |        |   |   |    |
|---------------------------------------------------------------------------------------------------------|----------------|-------------------------------------------------------------------------------------------------------------------------------------------------------|---|---|---|---|---|--------|---|---|----|
|                                                                                                         | Feasibility    | 1                                                                                                                                                     | 2 | 3 | 4 | 5 | 6 | 7      | 8 | 9 | 10 |
|                                                                                                         | Effectiveness  | 1                                                                                                                                                     | 2 | 3 | 4 | 5 | 6 | 7      | 8 | 9 | 10 |
| 4d) Adjust farming time (modifying planting, harvesting time etc.)                                      |                | (a) Yes                                                                                                                                               |   |   |   |   |   | (b) No |   |   |    |
|                                                                                                         |                | How likely is that you would recommend this practice: Please assign a score (with 1 representing “not at all” and 10 representing “extremely likely”) |   |   |   |   |   |        |   |   |    |
| Weights                                                                                                 | Sustainability | 1                                                                                                                                                     | 2 | 3 | 4 | 5 | 6 | 7      | 8 | 9 | 10 |
|                                                                                                         | Feasibility    | 1                                                                                                                                                     | 2 | 3 | 4 | 5 | 6 | 7      | 8 | 9 | 10 |
|                                                                                                         | Effectiveness  | 1                                                                                                                                                     | 2 | 3 | 4 | 5 | 6 | 7      | 8 | 9 | 10 |
| 5d) Switch to new cultivars (genetically modified varieties)                                            |                | (a) Yes                                                                                                                                               |   |   |   |   |   | (b) No |   |   |    |
|                                                                                                         |                | How likely is that you would recommend this practice: Please assign a score (with 1 representing “not at all” and 10 representing “extremely likely”) |   |   |   |   |   |        |   |   |    |
| Weights                                                                                                 | Sustainability | 1                                                                                                                                                     | 2 | 3 | 4 | 5 | 6 | 7      | 8 | 9 | 10 |
|                                                                                                         | Feasibility    | 1                                                                                                                                                     | 2 | 3 | 4 | 5 | 6 | 7      | 8 | 9 | 10 |
|                                                                                                         | Effectiveness  | 1                                                                                                                                                     | 2 | 3 | 4 | 5 | 6 | 7      | 8 | 9 | 10 |
| 6d) Intercropping                                                                                       |                | (a) Yes                                                                                                                                               |   |   |   |   |   | (b) No |   |   |    |
|                                                                                                         |                | How likely is that you would recommend this practice: Please assign a score (with 1 representing “not at all” and 10 representing “extremely likely”) |   |   |   |   |   |        |   |   |    |
| Weights                                                                                                 | Sustainability | 1                                                                                                                                                     | 2 | 3 | 4 | 5 | 6 | 7      | 8 | 9 | 10 |
|                                                                                                         | Feasibility    | 1                                                                                                                                                     | 2 | 3 | 4 | 5 | 6 | 7      | 8 | 9 | 10 |
|                                                                                                         | Effectiveness  | 1                                                                                                                                                     | 2 | 3 | 4 | 5 | 6 | 7      | 8 | 9 | 10 |
| 7d) Mixed cropping / Crop Diversification                                                               |                | (a) Yes                                                                                                                                               |   |   |   |   |   | (b) No |   |   |    |
|                                                                                                         |                | How likely is that you would recommend this practice: Please assign a score (with 1 representing “not at all” and 10 representing “extremely likely”) |   |   |   |   |   |        |   |   |    |
| Weights                                                                                                 | Sustainability | 1                                                                                                                                                     | 2 | 3 | 4 | 5 | 6 | 7      | 8 | 9 | 10 |
|                                                                                                         | Feasibility    | 1                                                                                                                                                     | 2 | 3 | 4 | 5 | 6 | 7      | 8 | 9 | 10 |
|                                                                                                         | Effectiveness  | 1                                                                                                                                                     | 2 | 3 | 4 | 5 | 6 | 7      | 8 | 9 | 10 |
| 8d) Change area under cultivation (increased or decreased)                                              |                | (a) Yes                                                                                                                                               |   |   |   |   |   | (b) No |   |   |    |
|                                                                                                         |                | How likely is that you would recommend this practice: Please assign a score (with 1 representing “not at all” and 10 representing “extremely likely”) |   |   |   |   |   |        |   |   |    |
| Weights                                                                                                 | Sustainability | 1                                                                                                                                                     | 2 | 3 | 4 | 5 | 6 | 7      | 8 | 9 | 10 |
|                                                                                                         | Feasibility    | 1                                                                                                                                                     | 2 | 3 | 4 | 5 | 6 | 7      | 8 | 9 | 10 |
|                                                                                                         | Effectiveness  | 1                                                                                                                                                     | 2 | 3 | 4 | 5 | 6 | 7      | 8 | 9 | 10 |
| 9d) Water conservation (through controlled irrigation, new technology or re-allocation of use of water) |                | (a) Yes                                                                                                                                               |   |   |   |   |   | (b) No |   |   |    |
|                                                                                                         |                | How likely is that you would recommend this practice: Please assign a score (with 1 representing “not at all” and 10 representing “extremely likely”) |   |   |   |   |   |        |   |   |    |
| Weights                                                                                                 | Sustainability | 1                                                                                                                                                     | 2 | 3 | 4 | 5 | 6 | 7      | 8 | 9 | 10 |

|                                                                                                                      |                |                                                                                                                                                       |   |   |   |   |   |        |   |   |    |
|----------------------------------------------------------------------------------------------------------------------|----------------|-------------------------------------------------------------------------------------------------------------------------------------------------------|---|---|---|---|---|--------|---|---|----|
|                                                                                                                      | Feasibility    | 1                                                                                                                                                     | 2 | 3 | 4 | 5 | 6 | 7      | 8 | 9 | 10 |
|                                                                                                                      | Effectiveness  | 1                                                                                                                                                     | 2 | 3 | 4 | 5 | 6 | 7      | 8 | 9 | 10 |
| 10d) Conservation of agriculture (for example soil conservation or agroforestry etc.)                                |                | (a) Yes                                                                                                                                               |   |   |   |   |   | (b) No |   |   |    |
|                                                                                                                      |                | How likely is that you would recommend this practice: Please assign a score (with 1 representing “not at all” and 10 representing “extremely likely”) |   |   |   |   |   |        |   |   |    |
| Weights                                                                                                              | Sustainability | 1                                                                                                                                                     | 2 | 3 | 4 | 5 | 6 | 7      | 8 | 9 | 10 |
|                                                                                                                      | Feasibility    | 1                                                                                                                                                     | 2 | 3 | 4 | 5 | 6 | 7      | 8 | 9 | 10 |
|                                                                                                                      | Effectiveness  | 1                                                                                                                                                     | 2 | 3 | 4 | 5 | 6 | 7      | 8 | 9 | 10 |
| 11d) Modifying farm practices (adjusting fertilizer, pesticide application or planting and harvesting modifications) |                | (a) Yes                                                                                                                                               |   |   |   |   |   | (b) No |   |   |    |
|                                                                                                                      |                | How likely is that you would recommend this practice: Please assign a score (with 1 representing “not at all” and 10 representing “extremely likely”) |   |   |   |   |   |        |   |   |    |
| Weights                                                                                                              | Sustainability | 1                                                                                                                                                     | 2 | 3 | 4 | 5 | 6 | 7      | 8 | 9 | 10 |
|                                                                                                                      | Feasibility    | 1                                                                                                                                                     | 2 | 3 | 4 | 5 | 6 | 7      | 8 | 9 | 10 |
|                                                                                                                      | Effectiveness  | 1                                                                                                                                                     | 2 | 3 | 4 | 5 | 6 | 7      | 8 | 9 | 10 |
| 12d) Purchasing weather index insurance for crops                                                                    |                | (a) Yes                                                                                                                                               |   |   |   |   |   | (b) No |   |   |    |
|                                                                                                                      |                | How likely is that you would recommend this practice: Please assign a score (with 1 representing “not at all” and 10 representing “extremely likely”) |   |   |   |   |   |        |   |   |    |
| Weights                                                                                                              | Sustainability | 1                                                                                                                                                     | 2 | 3 | 4 | 5 | 6 | 7      | 8 | 9 | 10 |
|                                                                                                                      | Feasibility    | 1                                                                                                                                                     | 2 | 3 | 4 | 5 | 6 | 7      | 8 | 9 | 10 |
|                                                                                                                      | Effectiveness  | 1                                                                                                                                                     | 2 | 3 | 4 | 5 | 6 | 7      | 8 | 9 | 10 |
| 13d) Increased investment in infrastructure                                                                          |                | (a) Yes                                                                                                                                               |   |   |   |   |   | (b) No |   |   |    |
|                                                                                                                      |                | How likely is that you would recommend this practice: Please assign a score (with 1 representing “not at all” and 10 representing “extremely likely”) |   |   |   |   |   |        |   |   |    |
| Weights                                                                                                              | Sustainability | 1                                                                                                                                                     | 2 | 3 | 4 | 5 | 6 | 7      | 8 | 9 | 10 |
|                                                                                                                      | Feasibility    | 1                                                                                                                                                     | 2 | 3 | 4 | 5 | 6 | 7      | 8 | 9 | 10 |
|                                                                                                                      | Effectiveness  | 1                                                                                                                                                     | 2 | 3 | 4 | 5 | 6 | 7      | 8 | 9 | 10 |
| 14d) Mulching                                                                                                        |                | (a) Yes                                                                                                                                               |   |   |   |   |   | (b) No |   |   |    |
|                                                                                                                      |                | How likely is that you would recommend this practice: Please assign a score (with 1 representing “not at all” and 10 representing “extremely likely”) |   |   |   |   |   |        |   |   |    |
| Weights                                                                                                              | Sustainability | 1                                                                                                                                                     | 2 | 3 | 4 | 5 | 6 | 7      | 8 | 9 | 10 |
|                                                                                                                      | Feasibility    | 1                                                                                                                                                     | 2 | 3 | 4 | 5 | 6 | 7      | 8 | 9 | 10 |
|                                                                                                                      | Effectiveness  | 1                                                                                                                                                     | 2 | 3 | 4 | 5 | 6 | 7      | 8 | 9 | 10 |
| 15d) Increasing non-agricultural income                                                                              |                | (a) Yes                                                                                                                                               |   |   |   |   |   | (b) No |   |   |    |
|                                                                                                                      |                | How likely is that you would recommend this practice: Please assign a score (with 1 representing “not at all” and 10 representing “extremely likely”) |   |   |   |   |   |        |   |   |    |
| Weights                                                                                                              | Sustainability | 1                                                                                                                                                     | 2 | 3 | 4 | 5 | 6 | 7      | 8 | 9 | 10 |

|                          |                |                                                                                                                                                       |   |   |   |   |   |        |   |   |    |
|--------------------------|----------------|-------------------------------------------------------------------------------------------------------------------------------------------------------|---|---|---|---|---|--------|---|---|----|
|                          | Feasibility    | 1                                                                                                                                                     | 2 | 3 | 4 | 5 | 6 | 7      | 8 | 9 | 10 |
|                          | Effectiveness  | 1                                                                                                                                                     | 2 | 3 | 4 | 5 | 6 | 7      | 8 | 9 | 10 |
| 16d) Migration to cities |                | (a) Yes                                                                                                                                               |   |   |   |   |   | (b) No |   |   |    |
|                          |                | How likely is that you would recommend this practice: Please assign a score (with 1 representing “not at all” and 10 representing “extremely likely”) |   |   |   |   |   |        |   |   |    |
| Weights                  | Sustainability | 1                                                                                                                                                     | 2 | 3 | 4 | 5 | 6 | 7      | 8 | 9 | 10 |
|                          | Feasibility    | 1                                                                                                                                                     | 2 | 3 | 4 | 5 | 6 | 7      | 8 | 9 | 10 |
|                          | Effectiveness  | 1                                                                                                                                                     | 2 | 3 | 4 | 5 | 6 | 7      | 8 | 9 | 10 |
